# Supplementary material for: Organic acids and 2,4-Di- tert -butylphenol: major compounds of Weissella confusa WM36 cell-free supernatant against growth, survival and virulence of Salmonella Typhi
Source: PeerJ journal article supplement (doi:10.7717/peerj.8410), 2020-01-20
Supplement: Figure_S1.pdf [file Figure_S1.pdf]

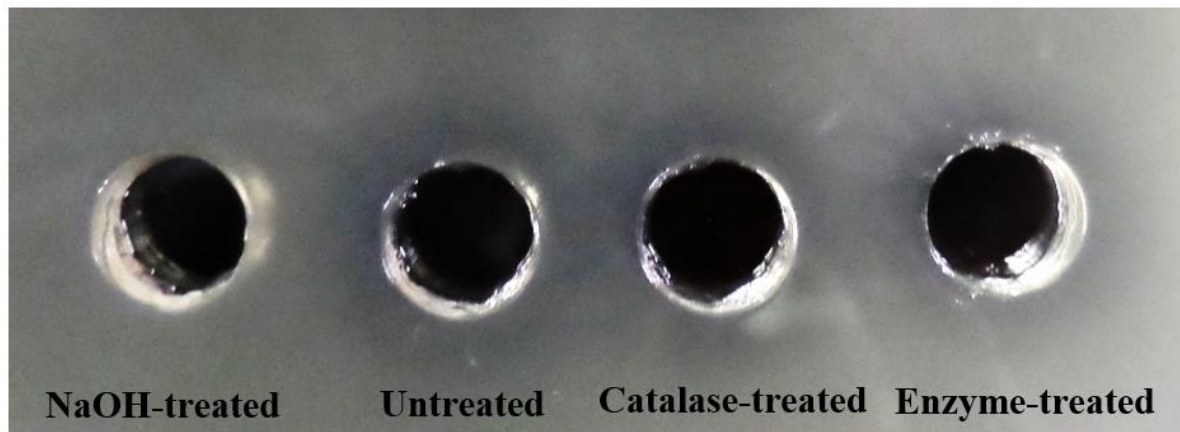

**Figure S1** Inhibitory clear zone of the vicinity of observed wells by determination of antibacterial substances in treated/neutralizing CFCS.
