# Supplementary material for: Organic acids and 2,4-Di- tert -butylphenol: major compounds of Weissella confusa WM36 cell-free supernatant against growth, survival and virulence of Salmonella Typhi
Source: PeerJ journal article supplement (doi:10.7717/peerj.8410), 2020-01-20
Supplement: Figure_S2.pdf [file Figure_S2.pdf]

Supplementary file

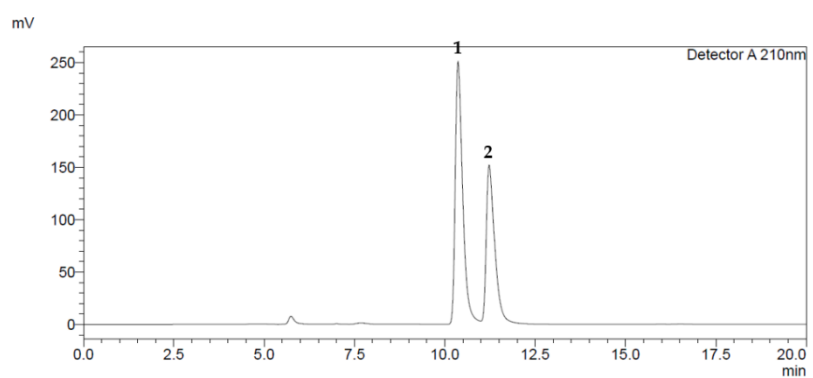

(a)

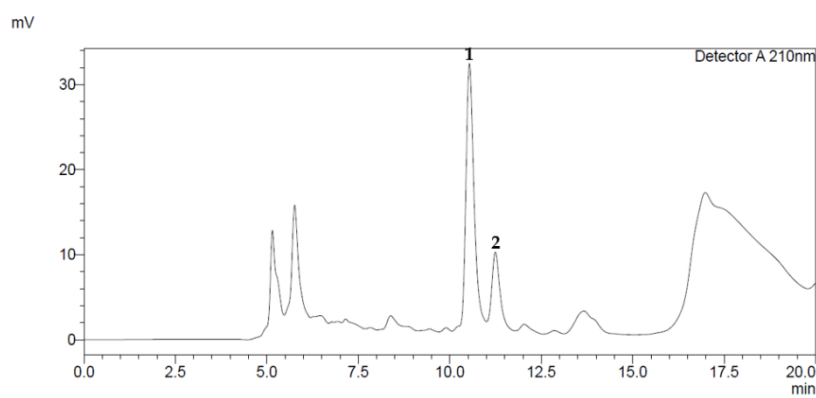

(b)

**Figure S1** HPLC chromatogram of (a) standard organic acids and (b) organic acids in WM36 cell-free culture supernatant. (1) lactic acid and (2) acetic acid.
