# Supplementary material for: Organic acids and 2,4-Di-tert-butylphenol: major compounds of Weissella confusa WM36 cell-free supernatant against growth, survival and virulence of Salmonella Typhi
Source: PeerJ. 2020 Jan 20;8:e8410. doi: 10.7717/peerj.8410 (PMC6977521; doi:10.7717/peerj.8410)
Supplement: Supplemental Information 1 [file peerj-08-8410-s001.xlsx]

## Sheet: pH
	CFCS	pH			pH average	SD
		Trial 1	Trial 2	Trial 3
	WM36	4.54	4.53	4.53	4.53333	0.0057735

## Sheet: TA
	Standardized NaOH
	KHP (g)	Used 1N NaOH (ml)		Normality
	0.8155	52.35		0.0762763
	0.6036	39.5		0.0748229
	0.7714	49.65		0.0760752
			Average	0.0757248
	Total titratable acidity
	CFCS	NaOH (ml)			Calculation (% LAE)			% Average	SD
		Trial 1	Trial 2	Trial 3	Trial 1	Trial 2	Trial 3
	WM36	1.6	1.55	1.7	1.09044	1.05636	1.15859	1.1018	0.0520522

## Sheet: lactic acid
	Standard Lactic acid
	Mw of Lactic acid		90.08	g/mol
	Concentration (mM)	Injection (ul)	mg	ug	Peak area (Lactic acid)			Average (Lactic acid)	Equation check (ug)
	1	20	0.0018016	1.8016	238560	237622	238026	238069	2.7146
	5	20	0.009008	9.008	607534	601383	599297	602738	8.2957
	10	20	0.018016	18.016	1262630	1179739	1177082	1.20648e+06	17.5358
	20	20	0.036032	36.032	2360824	2453325	2449267	2.42114e+06	36.1255
	30	20	0.054048	54.048	3603919	3588523	3620599	3604347	54.234
	Y intercept	60697.2
	Slope	65340
	RSQ	0.999104
	Treatment	inject (ul)	DF	Peak Area		Equation (ug/20 ul)		(ug/1000 ul)		(ug/ml) x DF		in 1 mL (mg/ml)		Aver	SD
	WM36	20	100	375600	373701	4.81945	4.79039	240.972	239.519	24097.2	23951.9	24.0972	23.9519	24.0246	0.102755
												mM		Aver	SD
												267.509	265.896	266.703	0.806599

## Sheet: acetic acid
	Standard Acetic acid
	Mw of Acetic acid		60.05	g/mol
	Concentration (mM)	Injection (ul)	mg	ug	Peak area (Acetic acid)			Average (Acetic acid)	Equation check (ug)
	1	20	0.001201	1.201	98045	98436	98233	98238	1.13844
	5	20	0.006005	6.005	468417	447930	447478	454608	6.0117
	10	20	0.01201	12.01	894298	894841	898032	895724	12.0438
	20	20	0.02402	24.02	1787162	1768393	1780285	1.77861e+06	24.1171
	30	20	0.03603	36.03	2506378	2705470	2721040	2644296	35.955
	Y intercept	14986.2
	Slope	73127.8
	RSQ	0.999975
	Treatment	inject (ul)	DF	PA		Equation (ug/20 ul)		(ug/1000 ul)		(ug/ml) x DF		in 1 mL (mg/ml)		Aver	SD
	WM36	20	100	237546	251455	3.04344	3.23364	152.172	161.682	15217.2	16168.2	15.2172	16.1682	15.6927	0.672463
												mM		Aver	SD
												253.408	269.245	261.327	7.91845
