# Supplementary material for: Organic acids and 2,4-Di-tert-butylphenol: major compounds of Weissella confusa WM36 cell-free supernatant against growth, survival and virulence of Salmonella Typhi
Source: PeerJ. 2020 Jan 20;8:e8410. doi: 10.7717/peerj.8410 (PMC6977521; doi:10.7717/peerj.8410)
Supplement: Supplemental Information 2 [file peerj-08-8410-s002.xlsx]

## Sheet: STP+wm36
	STP
	Time	Growth (number)			Aver	SD
	0	1660000	1600000	1420000	1560000	124900
	2	3400000	1500000	2630000	2510000	955667
	4	95000000	90000000	83400000	8.94667e+07	5.81836e+06
	8	123000000	162000000	190000000	1.58333e+08	3.36502e+07
	12	320000000	343000000	298000000	3.20333e+08	2.25019e+07
	16	367000000	312000000	338000000	339000000	2.75136e+07
	20	380000000	367000000	321000000	356000000	31000000
	24	310000000	330000000	295000000	3.11667e+08	1.75594e+07
	STP+WM36							%Salmonella survival
	Time	Growth (number)			Aver	SD		Time	%survival			Aver	SD
									rep1	rep2	rep3
	0	2010000	1000000	3200000	2070000	1.10123e+06		0	128.846	64.1026	205.128	132.692	70.5914
	2	542000	530000	490000	520667	27227.4		2	21.5936	21.1155	19.5219	20.7437	1.08476
	4	213000	367000	290000	290000	77000		4	0.238077	0.410209	0.324143	0.324143	0.0860656
	8	52000	32000	47000	43666.7	10408.3		8	0.0328421	0.0202105	0.0296842	0.0275789	0.00657368
	12	20000	23000	34000	25666.7	7371.11		12	0.0062435	0.00718002	0.0106139	0.00801249	0.00230108
	16	5200	8000	6700	6633.33	1401.19		16	0.00153392	0.00235988	0.0019764	0.00195674	0.00041333
	20	3300	4200	2900	3466.67	665.833		20	0.000926966	0.00117978	0.000814607	0.000973783	0.000187032
	24	4400	2000	5100	3833.33	1625.83		24	0.00141176	0.000641711	0.00163636	0.00122995	0.000521658
