# Supplementary material for: Organic acids and 2,4-Di-tert-butylphenol: major compounds of Weissella confusa WM36 cell-free supernatant against growth, survival and virulence of Salmonella Typhi
Source: PeerJ. 2020 Jan 20;8:e8410. doi: 10.7717/peerj.8410 (PMC6977521; doi:10.7717/peerj.8410)
Supplement: Supplemental Information 3 [file peerj-08-8410-s003.xlsx]

## Sheet: Motility
	Treatment	Swimming zone (mm)			Aver	SD			Swarmimgzone
		1	2	3					Tukey HSDa
	Control	45	50	40	45	5			GroupConcentration	N	Subset for alpha = 0.05
	0.4	0	0	0	0	0					1	2
	0.2	0	0	0	0	0			2	3	0
	0.1	43	47	47	45.6667	2.3094			3	3	0
									1	3		45
									4	3		45.6667
									Sig.		1	0.990239
									Descriptives
									Swarmimgzone
											N	Mean	Std. Deviation	Std. Error	95% Confidence Interval for Mean		Minimum	Maximum	Between- Component Variance
															Lower Bound	Upper Bound
									1		3	45	5	2.88675	32.5793	57.4207	40	50
									2		3	0	0	0	0	0	0	0
									3		3	0	0	0	0	0	0	0
									4		3	45.6667	2.3094	1.33333	39.9298	51.4035	43	47
									Total		12	22.6667	23.792	6.86817	7.54993	37.7834	0	50
									Model	Fixed Effects			2.75379	0.794949	20.8335	24.4998
										Random Effects				13.0873	-18.983	64.3163			682.583
